# Supplementary material for: Transcriptome variation along bud development in grapevine (Vitis vinifera L.)
Source: PubMed Central journal article supplement (PMC3519583; doi:10.1186/1471-2229-12-181), 2012-10-05

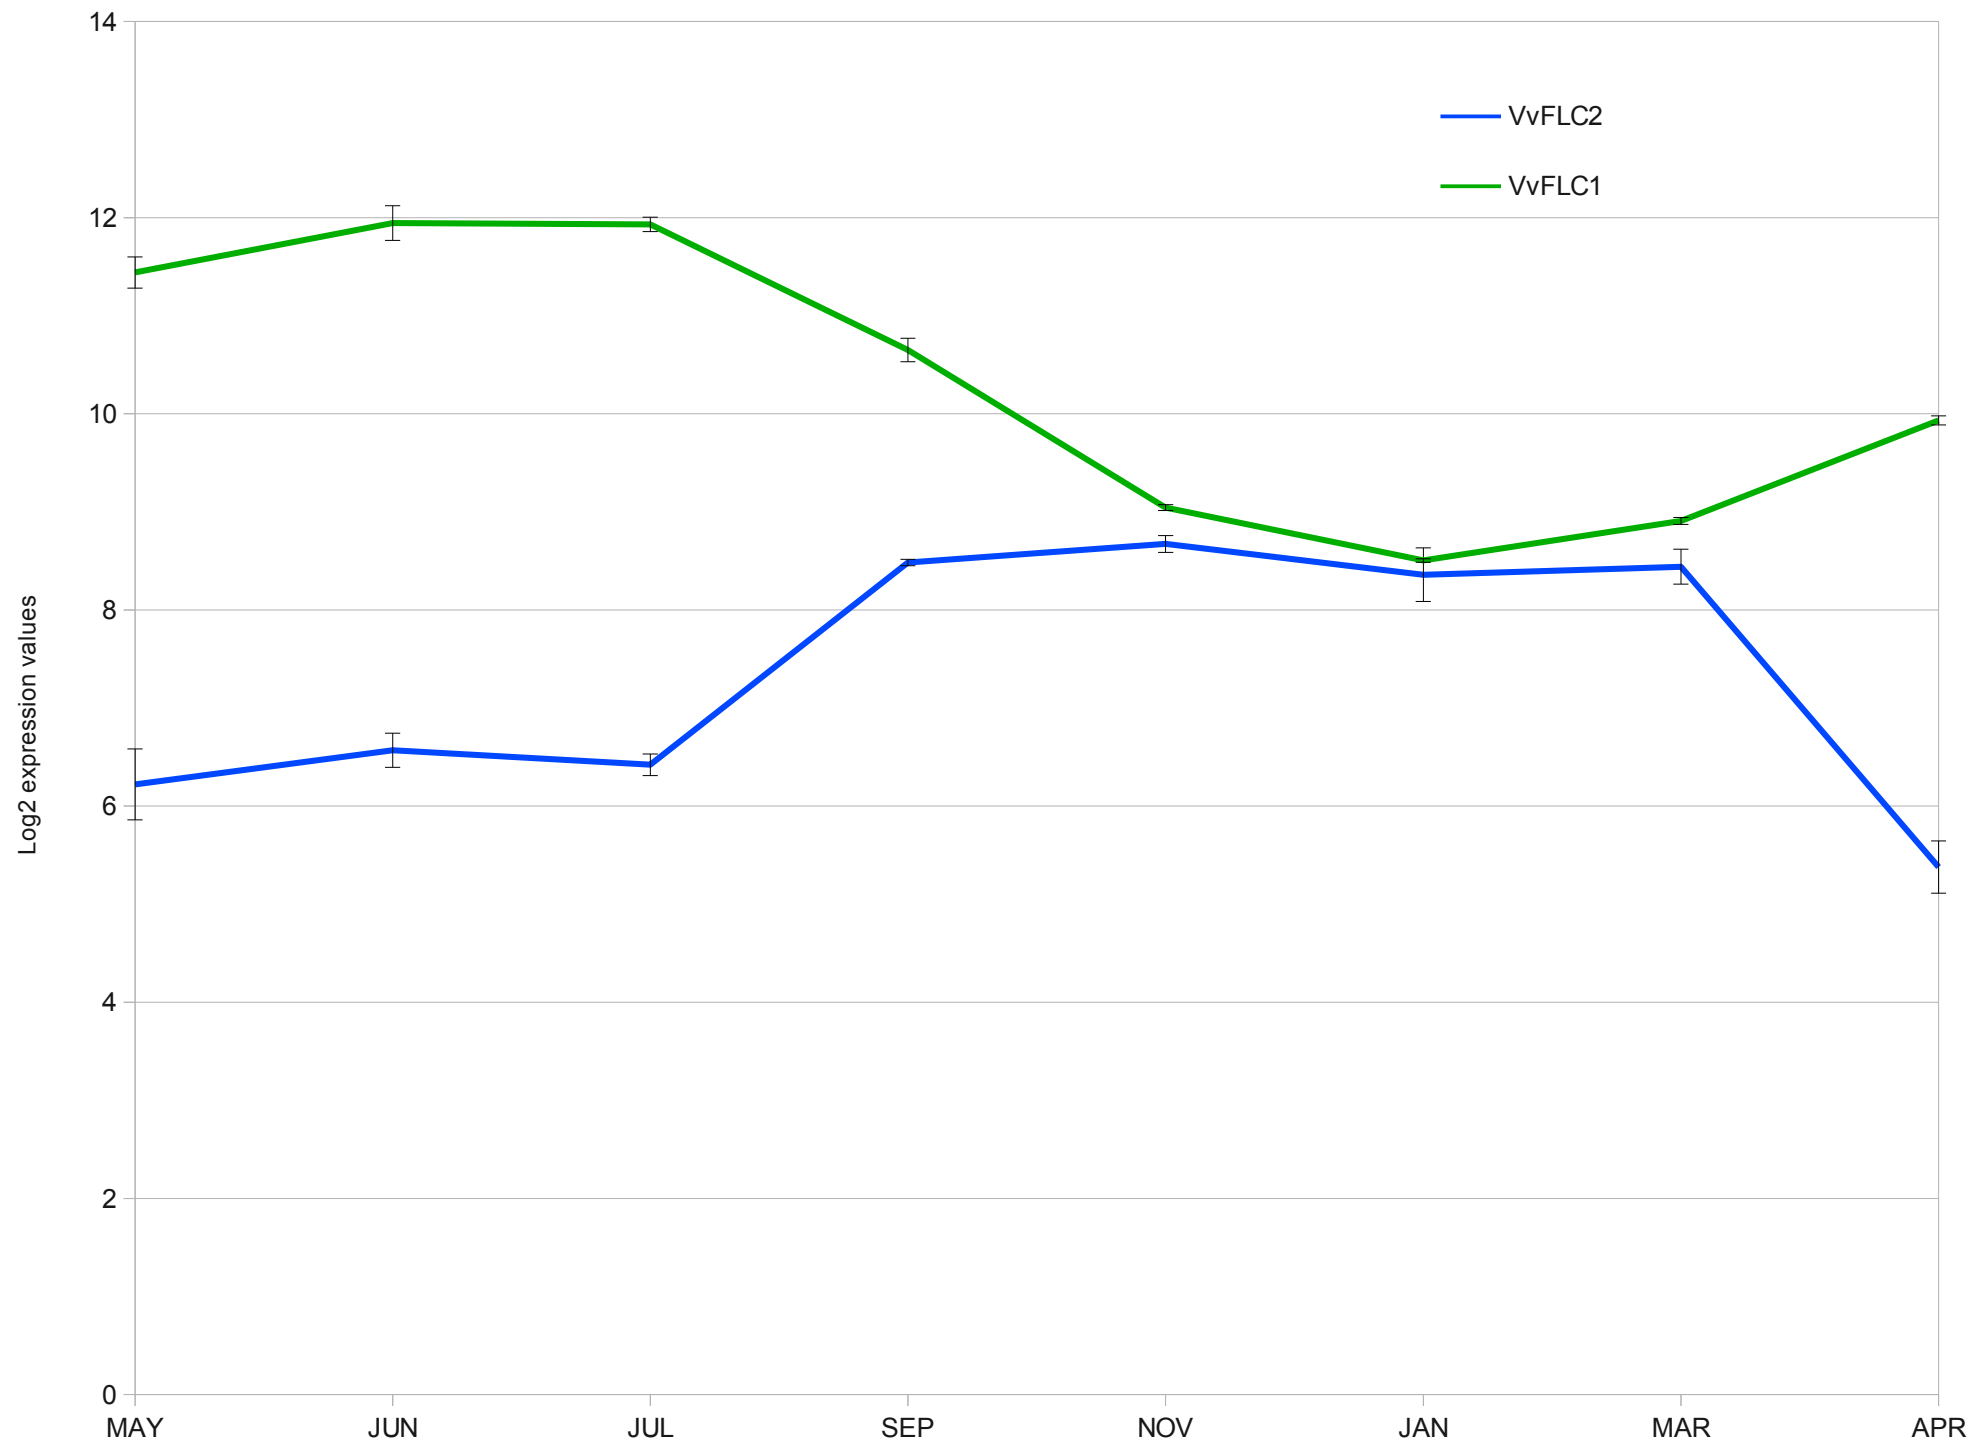

Supplement: 1471-2229-12-181-S5.pdf [file 1471-2229-12-181-S5.pdf]
